# Supplementary material for: Virtual Reconstruction and Prey Size Preference in the Mid Cenozoic Thylacinid, Nimbacinus dicksoni (Thylacinidae, Marsupialia)
Source: PubMed Central journal article supplement (PMC3981708; doi:10.1371/journal.pone.0093088), 2014-04-09

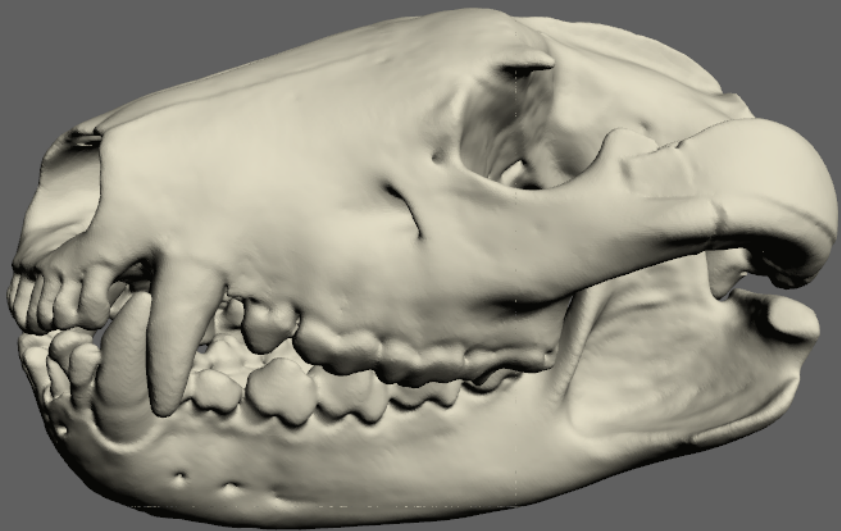

Supplement: pone.0093088.s003.pdf [file pone.0093088.s003.pdf]
