# Supplementary material for: Virtual Reconstruction and Prey Size Preference in the Mid Cenozoic Thylacinid, Nimbacinus dicksoni (Thylacinidae, Marsupialia)
Source: PubMed Central journal article supplement (PMC3981708; doi:10.1371/journal.pone.0093088), 2014-04-09
Supplement: pone.0093088.s007.pdf [file pone.0093088.s007.pdf]

| Taxon                            | Age           | Locality      | Reference               |
|----------------------------------|---------------|---------------|-------------------------|
| <i>Thylacinus cynocephalus</i>   | Plio-Recent   | Aust, Tas, NG | Harris, 1808            |
| <i>Thylacinus potens</i>         | L.Mio         | NT            | Woodburne, 1967         |
| <i>Thylacinus megiriani</i>      | L.Mio         | NT            | Murray, 1997            |
| <i>Tjarrpecinus rothi</i>        | L.Mio         | NT            | Murray & Megirian, 2000 |
| <i>Muribacinus gadiyuli</i>      | M.Mio         | Qld           | Wroe, 1996              |
| <i>Mutpuracinus archibaldi</i>   | M.Mio         | NT            | Murray & Megirian, 2006 |
| <i>Maximucinus muirheadae</i>    | M.Mio         | Qld           | Wroe, 2001              |
| <i>Nimbacinus richi</i>          | M.Mio         | NT            | Murray & Megirian, 2000 |
| <i>Thylacinus macknessi</i>      | E.-M. Mio     | Qld           | Muirhead, 1992          |
| <i>Ngamalacinus timmulvaneyi</i> | E.Mio         | Qld           | Muirhead, 1997          |
| <i>Wabulacinus ridei</i>         | E.Mio         | Qld           | Muirhead, 1997          |
| <i>Nimbacinus dicksoni</i>       | L.Oligo-M.Mio | Qld, NT       | Muirhead & Archer, 1990 |
| <i>Badjcinus turnbulli</i>       | L.Oligo       | Qld           | Muirhead & Wroe, 1998   |
