# Supplementary material for: Virtual Reconstruction and Prey Size Preference in the Mid Cenozoic Thylacinid, Nimbacinus dicksoni (Thylacinidae, Marsupialia)
Source: PubMed Central journal article supplement (PMC3981708; doi:10.1371/journal.pone.0093088), 2014-04-09
Supplement: pone.0093088.s008.pdf [file pone.0093088.s008.pdf]

---

| Species                        | Maximum bite force (N) during a<br>bilateral canine bite |
|--------------------------------|----------------------------------------------------------|
| <i>Dasyurus hallucatus</i>     | 93.70                                                    |
| <i>Dasyurus maculatus</i>      | 299.81                                                   |
| <i>Nimbacinus dicksoni</i>     | 406.81                                                   |
| <i>Sarcophilus harrisii</i>    | 705.84                                                   |
| <i>Thylacinus cynocephalus</i> | 835.94                                                   |

---
