# Supplementary material for: Virtual Reconstruction and Prey Size Preference in the Mid Cenozoic Thylacinid, Nimbacinus dicksoni (Thylacinidae, Marsupialia)
Source: PubMed Central journal article supplement (PMC3981708; doi:10.1371/journal.pone.0093088), 2014-04-09
Supplement: pone.0093088.s009.pdf [file pone.0093088.s009.pdf]

---

Muscle force distribution (in Newtons) of jaw muscle groups

---

|                              | <i>D. hallucatus</i> | <i>D. maculatus</i> | <i>N. dicksoni</i> | <i>S. harrisii</i> | <i>T. cynocephalus</i> |
|------------------------------|----------------------|---------------------|--------------------|--------------------|------------------------|
| <i>Temporalis</i>            |                      |                     |                    |                    |                        |
| <i>superficialis</i>         | 2.13                 | 6.73                | 11.24              | 11.84              | 26.78                  |
| <i>profundus</i>             | 2.13                 | 6.71                | 11.21              | 11.80              | 26.70                  |
| <i>Masseter</i>              |                      |                     |                    |                    |                        |
| <i>superficialis</i>         | 2.06                 | 6.51                | 10.87              | 11.45              | 25.90                  |
| <i>profundus</i>             | 2.01                 | 6.34                | 10.58              | 11.14              | 25.20                  |
| <i>Zygomatico</i>            |                      |                     |                    |                    |                        |
| <i>mandibularis</i>          | 2.31                 | 7.29                | 12.17              | 12.81              | 28.98                  |
| <i>pterygoideus internus</i> | 2.26                 | 7.13                | 11.90              | 12.53              | 28.35                  |
| <i>pterygoideus externus</i> | 2.01                 | 6.34                | 10.58              | 11.14              | 25.20                  |
| TOTAL                        | 14.91                | 47.04               | 78.56              | 82.72              | 187.11                 |
| Scaled muscle force          | 0.67                 | 0.52                | 0.59               | 0.68               | 1.02                   |

---
